# Supplementary material for: Cross‐talk between monocyte invasion and astrocyte proliferation regulates scarring in brain injury
Source: PubMed Central journal article supplement — EMBO Rep. 2018 Apr 9;19(5):e45294. doi: 10.15252/embr.201745294 (PMC5934774; doi:10.15252/embr.201745294), 2018-04-09
Supplement: EMBR-19-e45294-s001.pdf [file EMBR-19-e45294-s001.pdf]

## TABLE OF CONTENT

|                                                                                                                                                            |            |
|------------------------------------------------------------------------------------------------------------------------------------------------------------|------------|
| <b>Appendix Figure S1.</b> Absence of lymphocytes and predominance of CD45+/CD11b+ CD45+/CD11b+ monocytes/macrophages in the injured GM parenchyma at 3dpi | <b>1</b>   |
| <b>Appendix Figure S2.</b> Microglia proliferation between 3 and 5 days after injury                                                                       | <b>2</b>   |
| <b>Appendix Figure S3.</b> Tmem119+ microglia around the stab- wound injury site of WT and CCR2 <sup>-/-</sup> mice at 5dpi                                | <b>3</b>   |
| <b>Appendix Figure S4.</b> Faster resealing of the Blood-Brain Barrier (BBB) in the absence of monocyte invasion                                           | <b>4</b>   |
| <b>Appendix Figure S5.</b> Collagen I immunostaining in WT and CCR2 <sup>-/-</sup> mice at 28dpi                                                           | <b>5</b>   |
| <b>Appendix Figure S6.</b> Reduced astrogliotic scar in CCR2 <sup>-/-</sup> mice at 90dpi                                                                  | <b>6</b>   |
| <b>Appendix Figure Legends</b>                                                                                                                             | <b>7-9</b> |
| <b>Appendix Table S1.</b> Significantly regulated proteins in the biopsy of the injury site isolated at 5dpi from WT compared to CCR2 <sup>-/-</sup> mice  | <b>10</b>  |
| <b>Appendix Table S2.</b> Biological processes overrepresented with proteins more abundant in WT                                                           | <b>11</b>  |
| <b>Appendix Table S3.</b> Biological processes overrepresented with proteins more abundant in CCR2                                                         | <b>12</b>  |
| <b>Appendix Table S4.</b> Primary and secondary antibodies used for immunohistological analysis                                                            | <b>13</b>  |

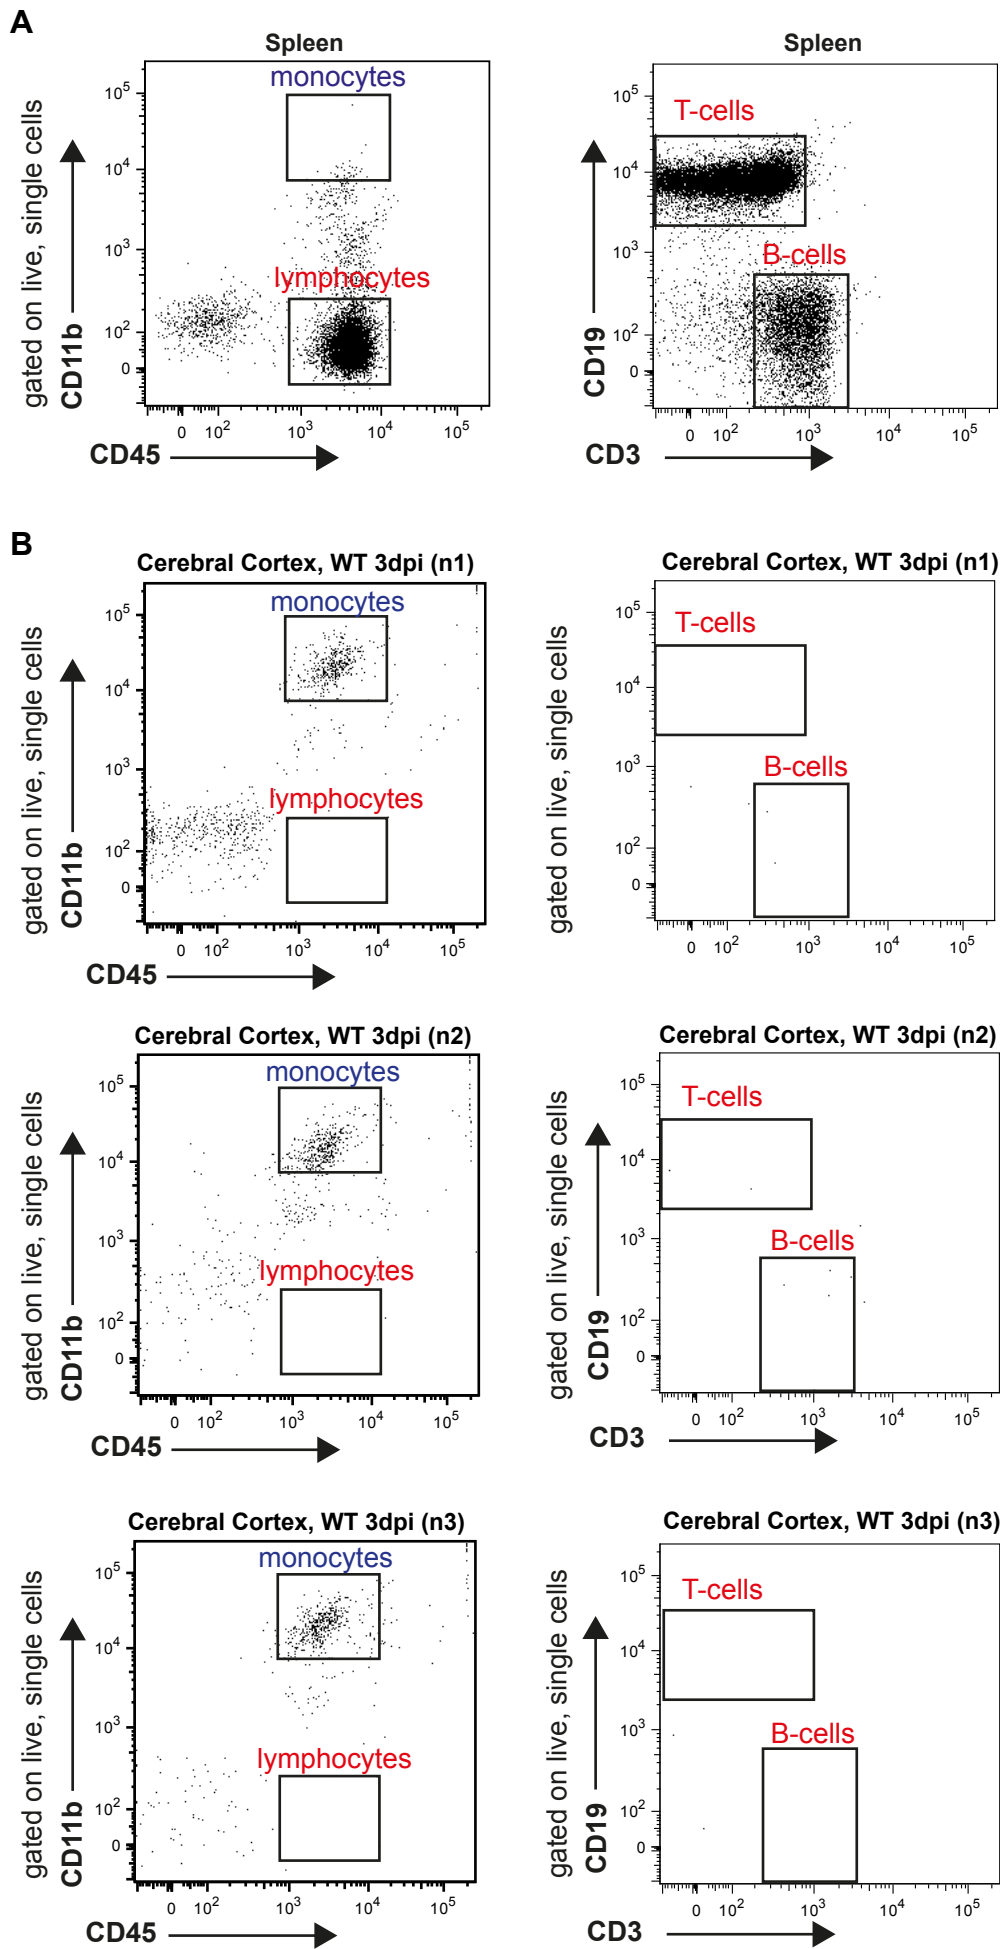

Appendix Figure S1

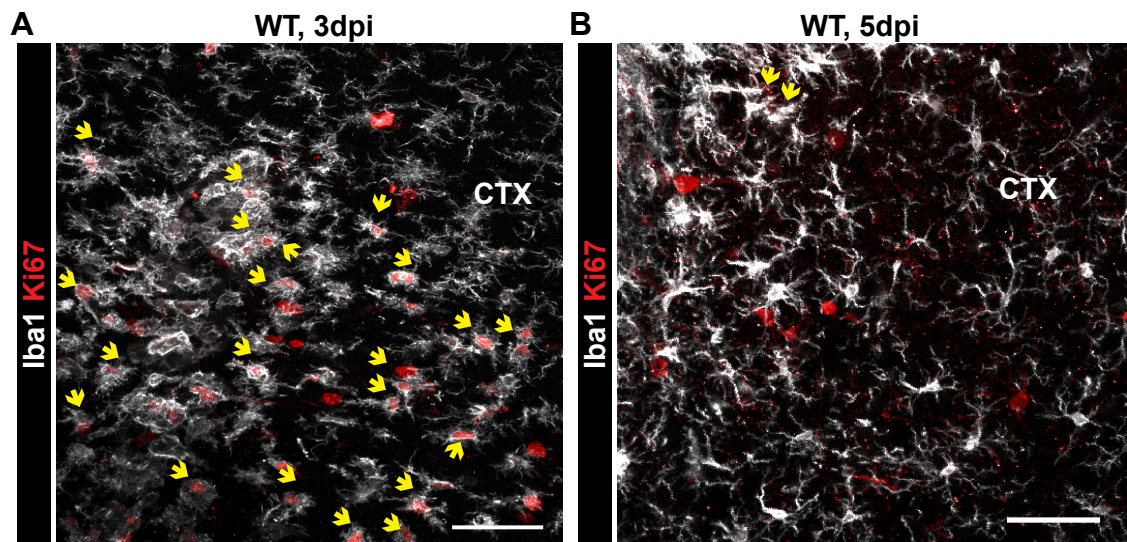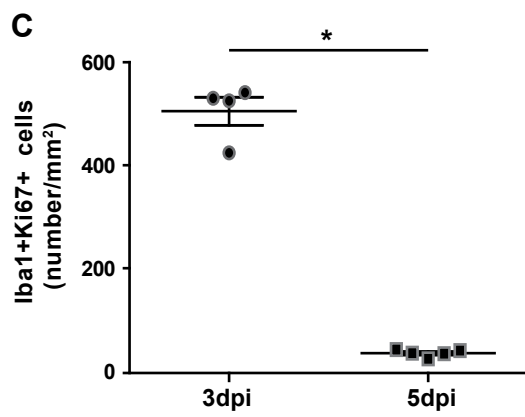

Appendix Figure S2

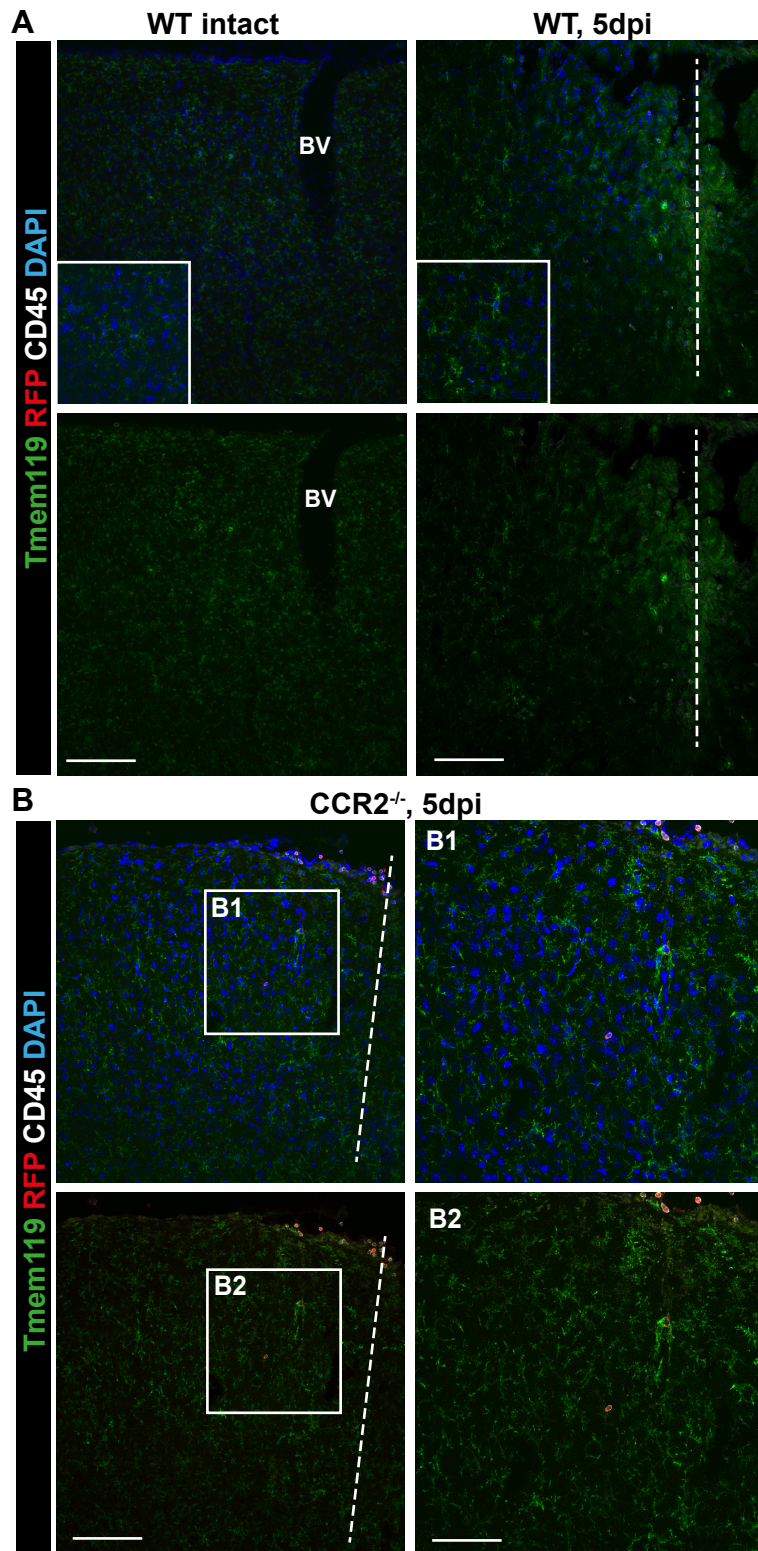

Appendix Figure S3

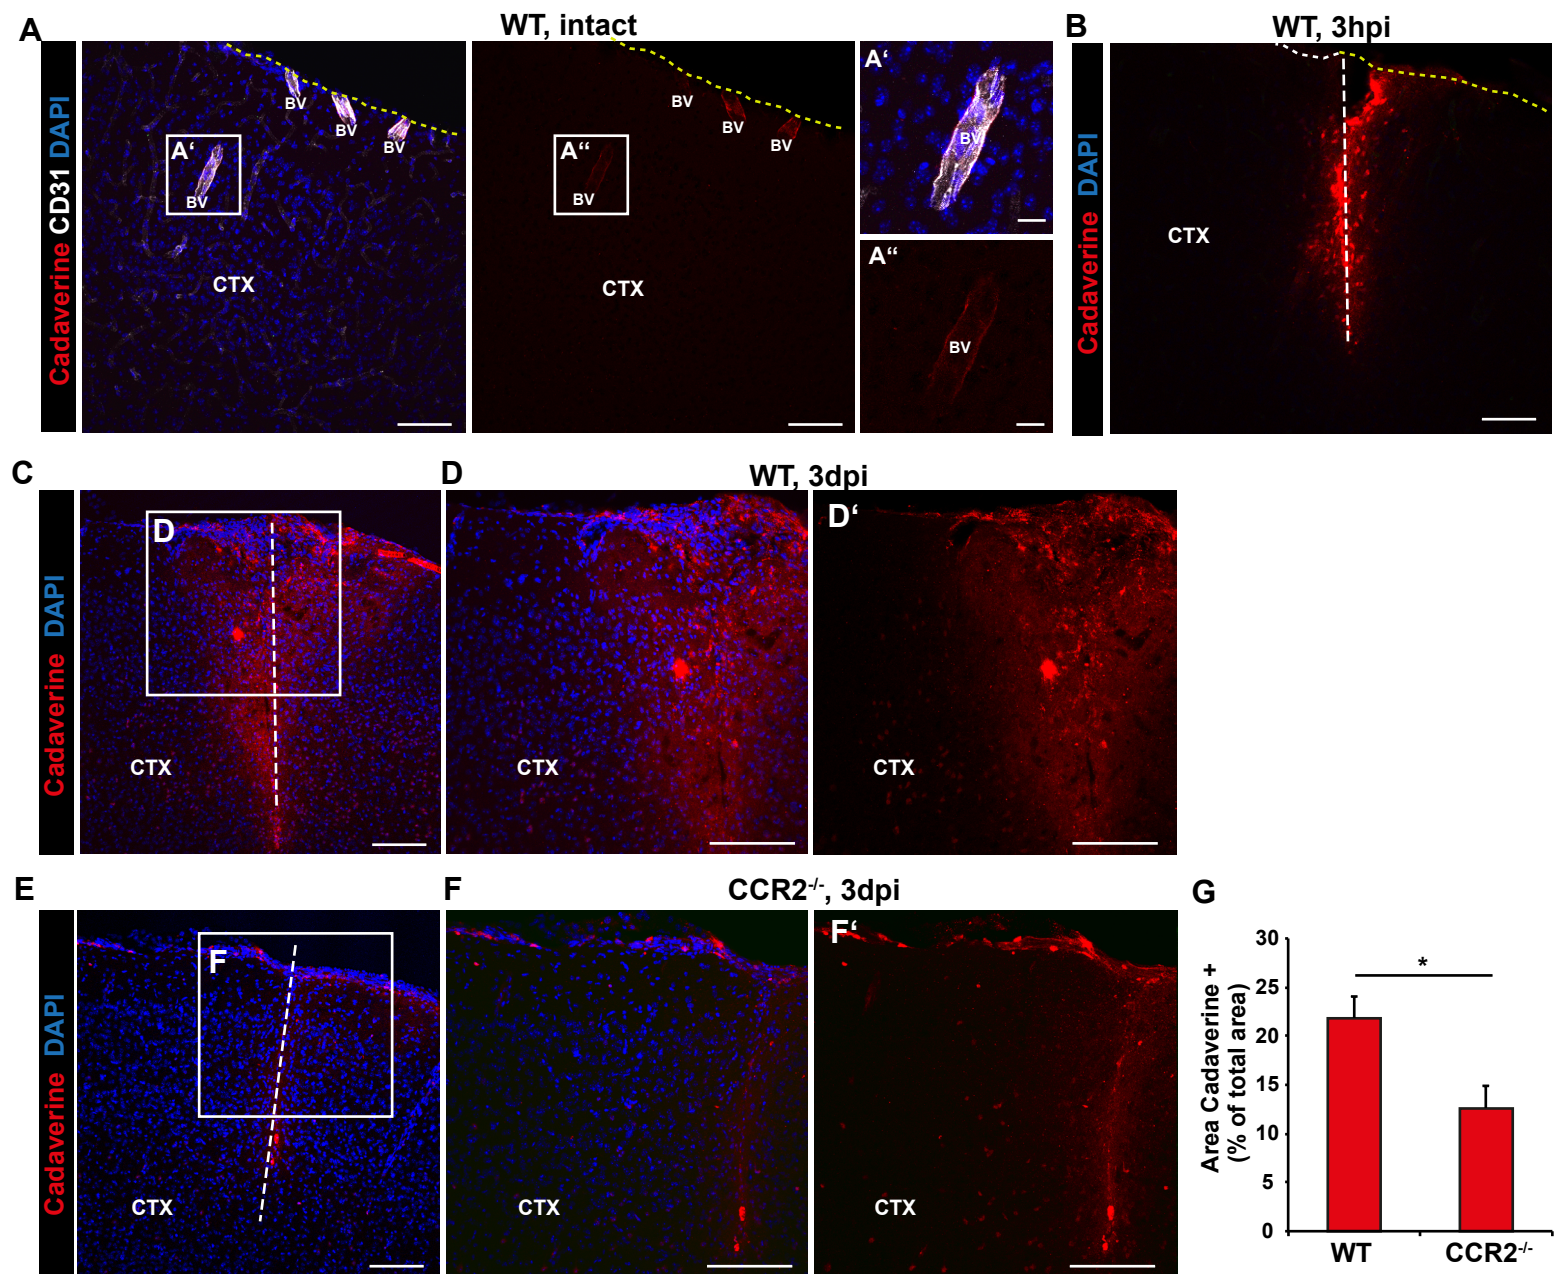

Appendix Figure S4

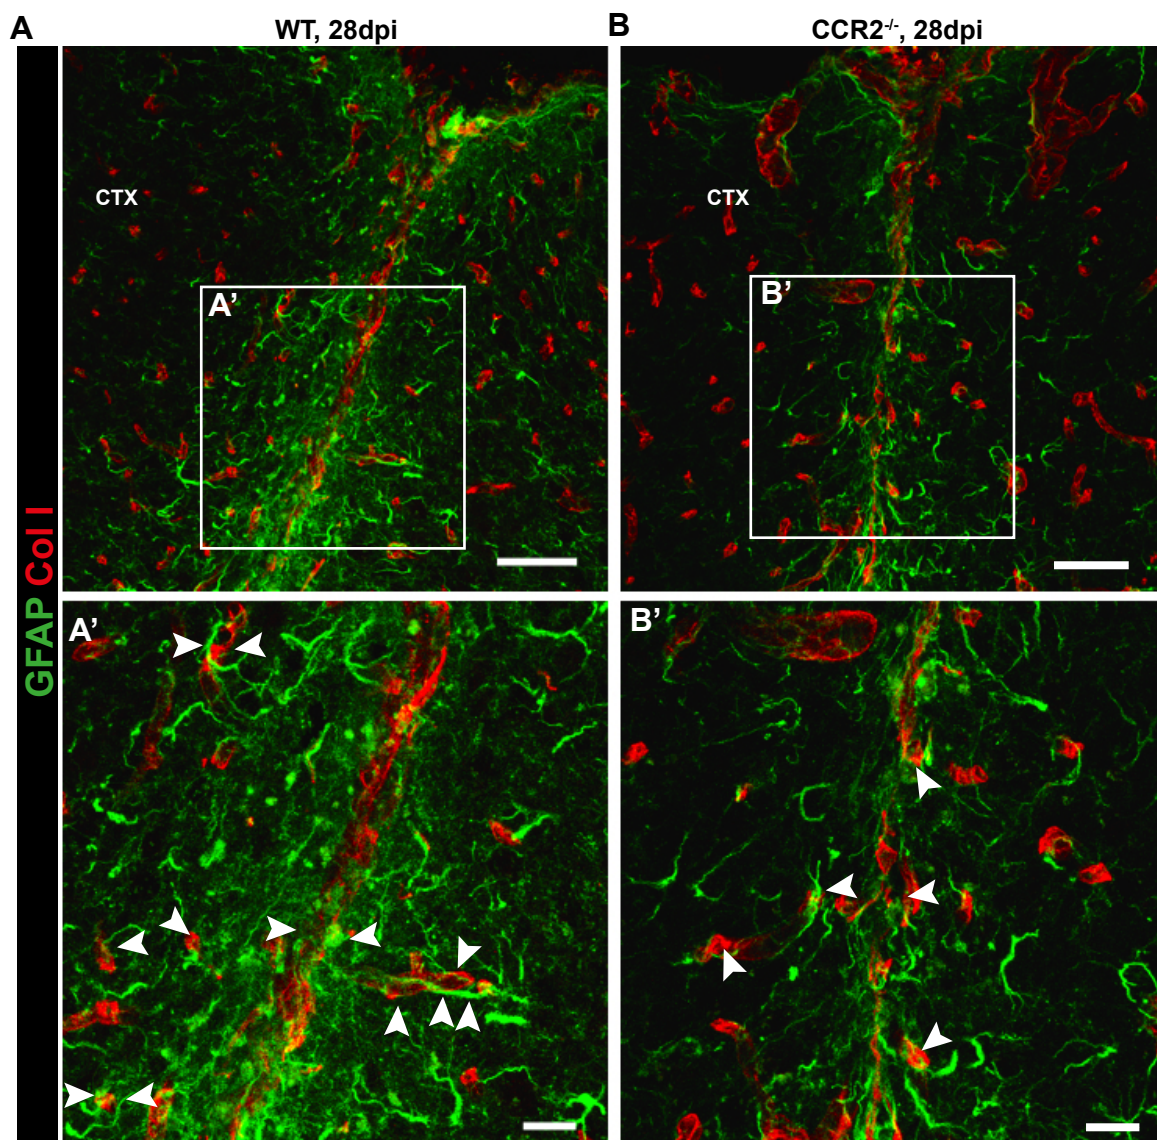

Appendix Figure S5

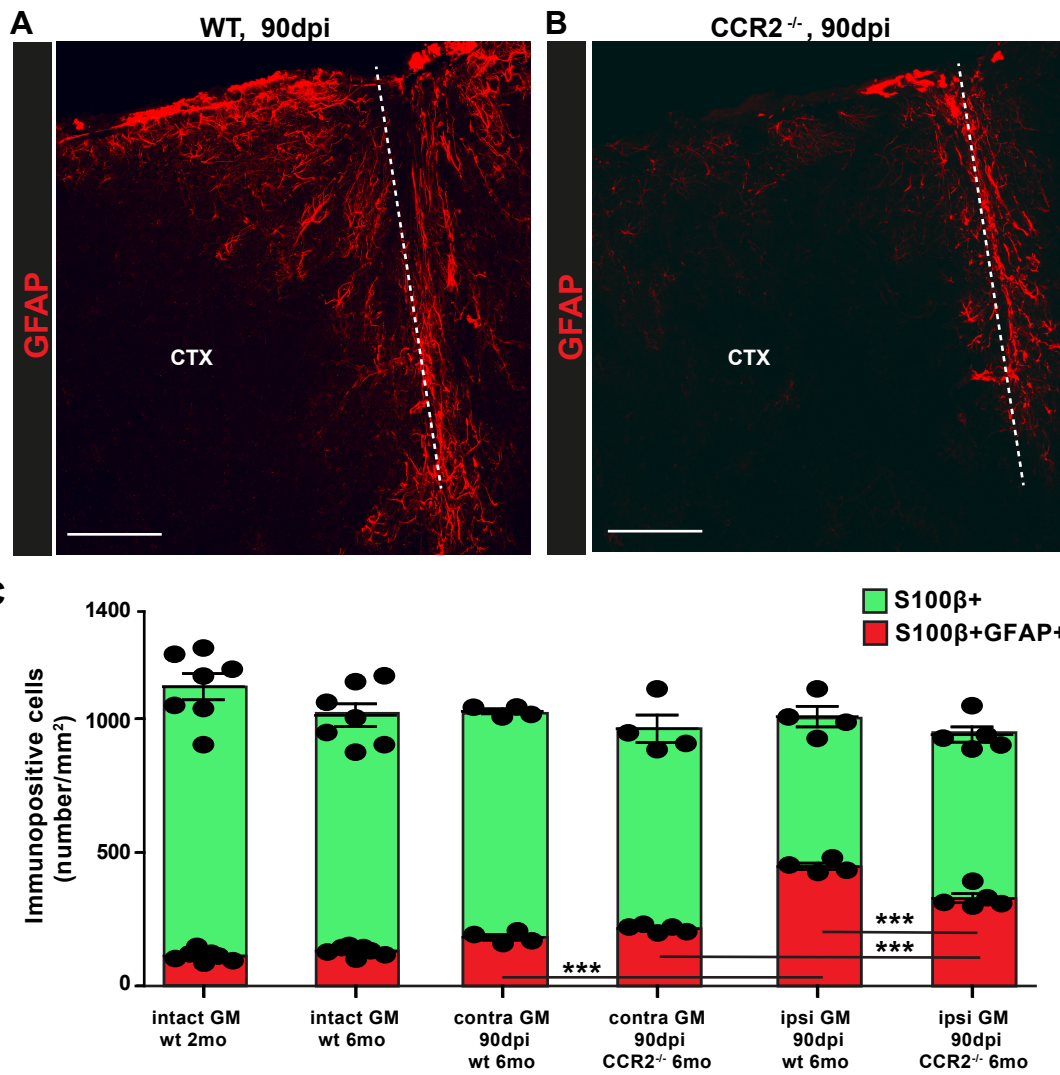

Appendix Figure S6

## Appendix Figure Legends

### Appendix Figure S1: Absence of lymphocytes and predominance of CD45<sup>+</sup>/CD11b<sup>+</sup> monocytes/macrophages in the injured GM parenchyma at 3 dpi.

Fluorescence-Activated Cell Sorting (FACS) of CD45<sup>+</sup> cells (isolated previously by magnetic activated cell sorting) was performed on spleen **(A)** and CD45<sup>+</sup> cells from the GM tissue at 3dpi isolated by MACS **(B)**. The identity of CD45<sup>+</sup> cells was determined by staining with CD11b (high: monocytes/macrophages, see B, n1, left panel; low: lymphocytes, see A), CD19 (T-cells, see A, right panel) and CD3 (B-cells, see A right panel). While lymphocytes were readily detectable in samples taken from spleen **(A)**, they were absent in brain tissue collected from the lesion site where CD45<sup>+</sup> cells were exclusively CD11b high monocytes/macrophages.

### Appendix Figure S2: Microglia proliferation between 3 and 5 days after injury.

Confocal images of Iba1 and Ki67 double-immunostaining in WT GM at 3 dpi **(A)** and 5 dpi **(B)**. Arrows point to double-positive cells, the proliferating microglia at the injury site. **(C)** Histogram depicting the number of Iba1<sup>+</sup>Ki67<sup>+</sup> cells in the injured cortical GM of WT mice at 3 dpi and 5 dpi. Of note, there was the steep decline in microglia proliferation at the injury site between 3-5 dpi. Data are represented as mean  $\pm$  SEM per independent experiments ( $p=0.0159$ ,  $n=4$  for 3 dpi and  $n=5$  for 5 dpi). Marks represent individual data points. Significance of differences between means was analyzed using Mann-Whitney test. Scale bars: 50 $\mu$ m.



**Appendix Figure S3: Tmem119+ microglia around the stab- wound injury site of WT and CCR2<sup>-/-</sup> mice at 5 dpi.** Representative confocal images of Tmem119 immunostaining in the intact (left panel) or injured (right panel) GM of WT **(A)** or CCR2<sup>-/-</sup> mice **(B)** shown with DAPI staining to visualize nuclei in the upper row and without DAPI in the lower row of panels. Higher magnification views are shown as boxes in **(A)** and as separate panels in B1 and B2 (location is indicated by boxed area in the left panels of B). The dashed lines indicate the injury site. Note the increase in Tmem119 immunostaining at the lesion site. Scale bars: 125µm (A, B), 50µm (B1, B2).

**Appendix Figure S4: Faster resealing of the Blood-Brain Barrier (BBB) in the absence of monocyte invasion.** Confocal images of the intact GM parenchyma showing restriction of 1-kDa Alexa Fluor 555–Cadaverine exclusively to the cerebral vasculature **(A)**. Higher magnification view of the boxed areas **(A'** and **A''** in **A)** shows Cadaverine within the lumen of blood vessels (BV). Representative images displaying the injury-related extravasation of Cadaverine-Alexa-555 into the GM parenchyma at 3 hours (3hpi) **(B)** and 3 days post stab wound in WT **(C, D)** and CCR2<sup>-/-</sup> **(E, F)** mice. The dashed lines indicate the site of injury. The cell nuclei were counterstained with DAPI and this staining is omitted in the panels **D'** and **F'**. **(G)** Quantification of Cadaverine labelled area within the injured GM at 3 dpi showed a significant reduction in CCR2<sup>-/-</sup> stab wound injured brains (Mann-Whitney test, \**p*=0.0376, n=6), suggesting faster resealing of the BBB in the absence of monocyte invasion. Data are represented as mean ± SEM per independent experiments. Scale bars: 100µm (A, B, C, D), 30µm (A', A'').

**Appendix Figure S5: Collagen I immunostaining in WT and CCR2<sup>-/-</sup> mice at 28 dpi.**

Representative confocal images showing Collagen 1- and GFAP-immunoreactivity at the injury site in WT (**A**) and CCR2<sup>-/-</sup> (**B**) mice at 28dpi. Higher magnification view of the boxed areas (**A'** in **A**, and **B'** in **B**) showing reduction in collagen I deposits in the center of the lesion (center of boxed areas) and fewer GFAP reactive cells and processes (arrowheads) at the collagen1<sup>+</sup> structures around the injury site in the CCR2<sup>-/-</sup> compared to WT mice. Scale bars: 100µm (A, B).

**Appendix Figure S6: Reduced astrogliotic scar in CCR2<sup>-/-</sup> mice at 90 dpi.**

Confocal images displaying GFAP in the injured GM from WT (**A**) and CCR2<sup>-/-</sup> (**B**) mice at 90dpi. Histogram in (**C**) depicts the total number of astrocytes (S100β<sup>+</sup>) and reactive (GFAP<sup>+</sup> and S100β<sup>+</sup>) astrocytes in a comparable region of the cerebral cortex GM at the injury site (ipsilateral) or in the contralateral hemisphere. Note that the increased astrocyte proliferation in CCR2<sup>-/-</sup> mice does not lead to a permanent increase in astrocyte numbers and rather results in a significant reduction of GFAP<sup>+</sup> cells at 90 dpi. All data are represented as mean ± SEM per independent experiments (n=7 for intact 6 months old WT mice, n=4 for WT 90 dpi and n=5 for CCR2 KO mice). Marks depict individual data points (animals). Significance of differences between means was analyzed using one way ANOVA with Tukeys post-hoc test and is indicated based on the *p* value (\*\*\*) (*p*<0.0001). Scale bars: 125µm.



| Biological processes overrepresented with proteins more abundant in WT                                 | GO-Term id | P-value | Fold enrichment | # Genes (observed) | # Genes (expected) | # Genes (total) | List of observed genes                                                                                    |
|--------------------------------------------------------------------------------------------------------|------------|---------|-----------------|--------------------|--------------------|-----------------|-----------------------------------------------------------------------------------------------------------|
| Biological processes (GO-Term)                                                                         |            |         |                 |                    |                    |                 |                                                                                                           |
| one-carbon compound transport                                                                          | GO:0019755 | 0.0001  | 175.0           | 2                  | 0.0                | 14              | Slc14a1, Car12                                                                                            |
| nicotinic acetylcholine receptor metabolic process                                                     | GO:1903570 | 0.0010  | 43.0            | 2                  | 0.0                | 57              | Itih3, B3gat2                                                                                             |
| kidney smooth muscle cell differentiation                                                              | GO:0072185 | 0.0016  | 612.8           | 1                  | 0.0                | 2               | Tahz3                                                                                                     |
| chitosaminoglycan metabolic process                                                                    | GO:0030203 | 0.0022  | 28.8            | 2                  | 0.1                | 85              | Itih3, B3gat2                                                                                             |
| kidney smooth muscle tissue development                                                                | GO:0072184 | 0.0024  | 408.4           | 1                  | 0.0                | 3               | Tahz3                                                                                                     |
| negative regulation of neuron switching to IqE isotypes                                                | GO:0048294 | 0.0024  | 40.4            | 1                  | 0.0                | 3               | Ndfip1                                                                                                    |
| aminoacyl metabolic process                                                                            | GO:006022  | 0.0029  | 24.8            | 2                  | 0.1                | 99              | Itih3, B3gat2                                                                                             |
| sensory perception of touch                                                                            | GO:0050975 | 0.0033  | 306.3           | 1                  | 0.0                | 4               | Tahz3                                                                                                     |
| negative regulation of isotype switching                                                               | GO:0048292 | 0.0033  | 30.3            | 1                  | 0.0                | 4               | Ndfip1                                                                                                    |
| urea transmembrane transport                                                                           | GO:0071918 | 0.0041  | 245.0           | 1                  | 0.0                | 5               | Slc14a1                                                                                                   |
| urater smooth muscle cell differentiation                                                              | GO:0072183 | 0.0041  | 245.0           | 1                  | 0.0                | 5               | Tahz3                                                                                                     |
| urater smooth muscle development                                                                       | GO:0072191 | 0.0041  | 245.0           | 1                  | 0.0                | 5               | Tahz3                                                                                                     |
| establishment of centrosome localization                                                               | GO:0051660 | 0.0041  | 245.0           | 1                  | 0.0                | 5               | Cep83                                                                                                     |
| intermediate filament bundle assembly                                                                  | GO:0045110 | 0.0049  | 204.2           | 1                  | 0.0                | 6               | Krt14                                                                                                     |
| urate transport                                                                                        | GO:0015840 | 0.0049  | 234.2           | 1                  | 0.0                | 6               | Slc14a1                                                                                                   |
| isotype switching to IqE isotypes                                                                      | GO:0048290 | 0.0057  | 175.0           | 1                  | 0.0                | 7               | Ndfip1                                                                                                    |
| negative regulation of interleukin-4 production                                                        | GO:0032713 | 0.0057  | 175.0           | 1                  | 0.0                | 7               | Ndfip1                                                                                                    |
| regulation of isotype switching to IqE isotypes                                                        | GO:0048293 | 0.0057  | 175.0           | 1                  | 0.0                | 7               | Ndfip1                                                                                                    |
| miRNA loading onto RISC involved in gene silencing by miRNA                                            | GO:0072590 | 0.0057  | 175.0           | 1                  | 0.0                | 7               | Agp4                                                                                                      |
| negative regulation of B cell mediated immunity                                                        | GO:002713  | 0.0065  | 153.1           | 1                  | 0.0                | 8               | Ndfip1                                                                                                    |
| negative regulation of immunoglobulin mediated immune response                                         | GO:0026294 | 0.0065  | 153.1           | 1                  | 0.0                | 8               | Ndfip1                                                                                                    |
| small RNA loading onto RISC                                                                            | GO:0070922 | 0.0065  | 153.1           | 1                  | 0.0                | 8               | Agp4                                                                                                      |
| carbon dioxide transport                                                                               | GO:0015670 | 0.0065  | 153.1           | 1                  | 0.0                | 8               | Car12                                                                                                     |
| negative regulation of autophagosome assembly                                                          | GO:1902902 | 0.0073  | 136.1           | 1                  | 0.0                | 9               | Fez1                                                                                                      |
| ion homeostasis                                                                                        | GO:0050564 | 0.0081  | 122.5           | 1                  | 0.0                | 10              | Car12                                                                                                     |
| osteolysis                                                                                             | GO:0030432 | 0.0081  | 122.5           | 1                  | 0.0                | 10              | Tahz3                                                                                                     |
| negative regulation of immunoglobulin production                                                       | GO:0002638 | 0.0081  | 122.5           | 1                  | 0.0                | 10              | Ndfip1                                                                                                    |
| SRP-dependent cotranslational protein targeting to membrane                                            | GO:0006614 | 0.0089  | 111.4           | 1                  | 0.0                | 11              | Sr3                                                                                                       |
| positive regulation of smooth muscle cell differentiation                                              | GO:0051152 | 0.0089  | 111.4           | 1                  | 0.0                | 11              | Tahz3                                                                                                     |
| monovalent inorganic anion homeostasis                                                                 | GO:0050583 | 0.0089  | 111.4           | 1                  | 0.0                | 11              | Car12                                                                                                     |
| negative regulation of 2'5' oligoadenylate synthetase gene expression                                  | GO:0072829 | 0.0089  | 111.4           | 1                  | 0.0                | 11              | Ndfip1                                                                                                    |
| regulation of isotype switching to IqG isotypes                                                        | GO:0048302 | 0.0089  | 102.1           | 1                  | 0.0                | 12              | Ndfip1                                                                                                    |
| adenylate cyclase-activating dopamine receptor signaling pathway                                       | GO:0071911 | 0.0098  | 102.1           | 1                  | 0.0                | 12              | Gnal                                                                                                      |
| urinary tract smooth muscle contraction                                                                | GO:0014848 | 0.0098  | 102.1           | 1                  | 0.0                | 12              | Tahz3                                                                                                     |
| fluid transport                                                                                        | GO:0002087 | 0.0106  | 94.2            | 1                  | 0.0                | 13              | Tahz3                                                                                                     |
| isotype switching to IqG isotypes                                                                      | GO:0048291 | 0.0108  | 94.2            | 1                  | 0.0                | 13              | Ndfip1                                                                                                    |
| organelle assembly                                                                                     | GO:0009110 | 0.0108  | 2.4             | 8                  | 3.3                | 4087            | Bin2, Slc14a1, Fez1, Tmem63c, Cep83, Sr3, Ndfip1, Car12                                                   |
| urater development                                                                                     | GO:0072189 | 0.0114  | 87.5            | 1                  | 0.0                | 14              | Tahz3                                                                                                     |
| mitochondrial tubulation                                                                               | GO:0097320 | 0.0114  | 87.5            | 1                  | 0.0                | 14              | Bin2                                                                                                      |
| establishment of mitochondrion localization                                                            | GO:0051654 | 0.0114  | 87.5            | 1                  | 0.0                | 14              | Fez1                                                                                                      |
| one-mRNA processing                                                                                    | GO:0031054 | 0.0114  | 87.5            | 1                  | 0.0                | 14              | Agp4                                                                                                      |
| ribosome biogenesis                                                                                    | GO:0031000 | 0.0114  | 87.5            | 1                  | 0.0                | 14              | Gnal                                                                                                      |
| miRNA mediated inhibition of translation                                                               | GO:0038278 | 0.0122  | 81.7            | 1                  | 0.0                | 15              | Agp4                                                                                                      |
| cotranslational protein targeting to membrane                                                          | GO:0006613 | 0.0122  | 81.7            | 1                  | 0.0                | 15              | Sr3                                                                                                       |
| fluid transport                                                                                        | GO:0009110 | 0.0122  | 81.7            | 1                  | 0.0                | 15              | Ndfip1                                                                                                    |
| regulation of translation, ncRNA-mediated                                                              | GO:0495974 | 0.0130  | 76.6            | 1                  | 0.0                | 16              | Agp4                                                                                                      |
| regulation of respiratory system process                                                               | GO:0044065 | 0.0130  | 76.6            | 1                  | 0.0                | 16              | Tahz3                                                                                                     |
| negative regulation of translation, ncRNA-mediated                                                     | GO:0040033 | 0.0130  | 76.6            | 1                  | 0.0                | 16              | Agp4                                                                                                      |
| gas transport                                                                                          | GO:0015669 | 0.0130  | 76.6            | 1                  | 0.0                | 16              | Car12                                                                                                     |
| establishment of localization                                                                          | GO:0051234 | 0.0133  | 2.3             | 8                  | 3.5                | 4232            | Bin2, Slc14a1, Fez1, Tmem63c, Cep83, Sr3, Ndfip1, Car12                                                   |
| chondroitin sulfate proteoglycan biosynthetic process                                                  | GO:0050650 | 0.0138  | 72.1            | 1                  | 0.0                | 17              | B3gat2                                                                                                    |
| protein transport                                                                                      | GO:0006853 | 0.0138  | 72.1            | 1                  | 0.0                | 17              | Slc14a1                                                                                                   |
| activation of adenylate cyclase activity                                                               | GO:0007190 | 0.0138  | 72.1            | 1                  | 0.0                | 17              | Gnal                                                                                                      |
| protein targeting to ER                                                                                | GO:0046347 | 0.0146  | 66.1            | 1                  | 0.0                | 18              | Sr3                                                                                                       |
| response to androgen                                                                                   | GO:0001975 | 0.0146  | 66.1            | 1                  | 0.0                | 18              | Gnal                                                                                                      |
| response to amine                                                                                      | GO:0014075 | 0.0154  | 64.5            | 1                  | 0.0                | 19              | Gnal                                                                                                      |
| phasic smooth muscle contraction                                                                       | GO:0014821 | 0.0162  | 61.3            | 1                  | 0.0                | 20              | Tahz3                                                                                                     |
| cytokine assembly                                                                                      | GO:0071801 | 0.0170  | 58.3            | 1                  | 0.0                | 21              | Bin2                                                                                                      |
| synaptonemal complex assembly                                                                          | GO:0007130 | 0.0170  | 58.3            | 1                  | 0.0                | 21              | Agp4                                                                                                      |
| protein localization to centrosome                                                                     | GO:0071538 | 0.0170  | 58.3            | 1                  | 0.0                | 21              | Cep83                                                                                                     |
| mRNA metabolic process                                                                                 | GO:0014846 | 0.0170  | 58.3            | 1                  | 0.0                | 21              | Agp4                                                                                                      |
| regulation of smooth muscle cell differentiation                                                       | GO:0051150 | 0.0170  | 58.3            | 1                  | 0.0                | 21              | Tahz3                                                                                                     |
| negative regulation of organelle assembly                                                              | GO:1902116 | 0.0178  | 55.7            | 1                  | 0.0                | 22              | Fez1                                                                                                      |
| establishment of protein localization to endoplasmic reticulum                                         | GO:0072599 | 0.0178  | 55.7            | 1                  | 0.0                | 22              | Sr3                                                                                                       |
| centrosome localization                                                                                | GO:0051642 | 0.0178  | 55.7            | 1                  | 0.0                | 22              | Cep83                                                                                                     |
| negative regulation of DNA recombination                                                               | GO:0045910 | 0.0178  | 55.7            | 1                  | 0.0                | 22              | Ndfip1                                                                                                    |
| regulation of respiratory gaseous exchange                                                             | GO:0045376 | 0.0186  | 53.3            | 1                  | 0.0                | 23              | Tahz3                                                                                                     |
| chondroitin sulfate metabolic process                                                                  | GO:0030204 | 0.0186  | 53.3            | 1                  | 0.0                | 23              | B3gat2                                                                                                    |
| fluid transport                                                                                        | GO:0042044 | 0.0184  | 51.0            | 1                  | 0.0                | 24              | Slc14a1                                                                                                   |
| intermediate filament organization                                                                     | GO:0045108 | 0.0184  | 51.0            | 1                  | 0.0                | 24              | Krt14                                                                                                     |
| negative regulation of macroautophagy                                                                  | GO:0016242 | 0.0184  | 51.0            | 1                  | 0.0                | 24              | Fez1                                                                                                      |
| synaptonemal complex organization                                                                      | GO:0070193 | 0.0184  | 51.0            | 1                  | 0.0                | 24              | Agp4                                                                                                      |
| hyaluronan metabolic process                                                                           | GO:0030212 | 0.0202  | 49.0            | 1                  | 0.0                | 25              | Itih3                                                                                                     |
| regulation of type 2 immune response                                                                   | GO:0050268 | 0.0210  | 47.1            | 1                  | 0.0                | 26              | Ndfip1                                                                                                    |
| ion homeostasis                                                                                        | GO:0050581 | 0.0210  | 47.1            | 1                  | 0.0                | 26              | Car12                                                                                                     |
| smooth muscle tissue development                                                                       | GO:0048745 | 0.0218  | 45.4            | 1                  | 0.0                | 27              | Tahz3                                                                                                     |
| regulation of isotype switching                                                                        | GO:0045191 | 0.0226  | 43.8            | 1                  | 0.0                | 28              | Ndfip1                                                                                                    |
| chondroitin sulfate proteoglycan metabolic process                                                     | GO:0050654 | 0.0226  | 43.8            | 1                  | 0.0                | 28              | B3gat2                                                                                                    |
| production of miRNAs involved in gene silencing by miRNA                                               | GO:0051396 | 0.0226  | 43.8            | 1                  | 0.0                | 28              | Agp4                                                                                                      |
| regulation of interleukin-4 production                                                                 | GO:0032713 | 0.0234  | 42.2            | 1                  | 0.0                | 29              | Ndfip1                                                                                                    |
| negative regulation of production of molecular mediator of immune response                             | GO:0002701 | 0.0234  | 42.2            | 1                  | 0.0                | 29              | Ndfip1                                                                                                    |
| production of small RNA involved in gene silencing by RNA                                              | GO:0070918 | 0.0234  | 42.2            | 1                  | 0.0                | 29              | Agp4                                                                                                      |
| mRNA transcription                                                                                     | GO:0031050 | 0.0234  | 42.2            | 1                  | 0.0                | 29              | Agp4                                                                                                      |
| positive regulation of adenylate cyclase activity                                                      | GO:0045762 | 0.0242  | 40.8            | 1                  | 0.0                | 30              | Gnal                                                                                                      |
| protein localization to microtubule cytoskeleton                                                       | GO:0072958 | 0.0250  | 39.5            | 1                  | 0.0                | 31              | Cep83                                                                                                     |
| negative regulation of adaptive immune response based on somatic recombination of immunoglobulin genes | GO:0052623 | 0.0250  | 39.5            | 1                  | 0.0                | 31              | Ndfip1                                                                                                    |
| negative regulation of B cell activation                                                               | GO:0050889 | 0.0250  | 39.5            | 1                  | 0.0                | 31              | Ndfip1                                                                                                    |
| single-organism transport                                                                              | GO:0044765 | 0.0258  | 2.5             | 6                  | 2.4                | 2946            | Bin2, Slc14a1, Tmem63c, Sr3, Ndfip1, Car12                                                                |
| regulation of autophagosome assembly                                                                   | GO:2100726 | 0.0258  | 38.3            | 1                  | 0.0                | 32              | Fez1                                                                                                      |
| respiratory system process                                                                             | GO:0003016 | 0.0258  | 38.3            | 1                  | 0.0                | 32              | Tahz3                                                                                                     |
| type 2 immune response                                                                                 | GO:0042092 | 0.0258  | 38.3            | 1                  | 0.0                | 32              | Ndfip1                                                                                                    |
| regulation of developmental process                                                                    | GO:0050793 | 0.0271  | 36.0            | 1                  | 0.0                | 33              | Itih3, Fez1, Tahz3, Ndfip1                                                                                |
| negative regulation of adaptive immune response                                                        | GO:0002820 | 0.0274  | 36.0            | 1                  | 0.0                | 34              | Ndfip1                                                                                                    |
| one-carbon metabolic process                                                                           | GO:0006730 | 0.0274  | 36.0            | 1                  | 0.0                | 34              | Car12                                                                                                     |
| mitochondrion localization                                                                             | GO:0051646 | 0.0282  | 35.0            | 1                  | 0.0                | 35              | Fez1                                                                                                      |
| protein localization to cytoskeleton                                                                   | GO:0044380 | 0.0282  | 35.0            | 1                  | 0.0                | 35              | Cep83                                                                                                     |
| dopamine receptor signaling pathway                                                                    | GO:0007212 | 0.0290  | 34.0            | 1                  | 0.0                | 36              | Gnal                                                                                                      |
| intermediate filament organization                                                                     | GO:0045108 | 0.0290  | 34.0            | 1                  | 0.0                | 36              | Ndfip1                                                                                                    |
| cellular component assembly                                                                            | GO:0022907 | 0.0297  | 2.8             | 5                  | 1.8                | 2227            | Krt14, Bin2, Agp4, Fez1, Cep83                                                                            |
| establishment of organelle localization                                                                | GO:0051656 | 0.0304  | 7.3             | 2                  | 0.3                | 337             | Fez1, Cep83                                                                                               |
| positive regulation of tyrosine activity                                                               | GO:0051349 | 0.0306  | 32.2            | 1                  | 0.0                | 38              | Gnal                                                                                                      |
| protein localization to endoplasmic reticulum                                                          | GO:0070912 | 0.0306  | 32.2            | 1                  | 0.0                | 38              | Ndfip1                                                                                                    |
| negative regulation of lymphocyte mediated immunity                                                    | GO:0002707 | 0.0306  | 32.2            | 1                  | 0.0                | 38              | Ndfip1                                                                                                    |
| cellular iron homeostasis                                                                              | GO:0050679 | 0.0306  | 32.2            | 1                  | 0.0                | 38              | Ndfip1                                                                                                    |
| cell differentiation involved in kidney development                                                    | GO:0051025 | 0.0306  | 32.2            | 1                  | 0.0                | 38              | Tahz3                                                                                                     |
| positive regulation of cyclase activity                                                                | GO:0031281 | 0.0306  | 32.2            | 1                  | 0.0                | 38              | Gnal                                                                                                      |
| male meiosis                                                                                           | GO:0007140 | 0.0314  | 31.4            | 1                  | 0.0                | 39              | Agp4                                                                                                      |
| regulation of vesicle organization                                                                     | GO:0044088 | 0.0314  | 31.4            | 1                  | 0.0                | 39              | Fez1                                                                                                      |
| intermediate filament cytoskeleton organization                                                        | GO:0045104 | 0.0330  | 29.9            | 1                  | 0.0                | 41              | Krt14                                                                                                     |
| proteoglycan biosynthetic process                                                                      | GO:0030166 | 0.0330  | 29.9            | 1                  | 0.0                | 41              | B3gat2                                                                                                    |
| single-organism localization                                                                           | GO:1902678 | 0.0335  | 2.3             | 6                  | 2.6                | 3130            | Bin2, Slc14a1, Tmem63c, Sr3, Ndfip1, Car12                                                                |
| intermediate filament-based process                                                                    | GO:0045103 | 0.0337  | 29.2            | 1                  | 0.0                | 42              | Krt14                                                                                                     |
| isotype switching                                                                                      | GO:0007128 | 0.0345  | 28.5            | 1                  | 0.0                | 43              | Agp4                                                                                                      |
| somatic recombination of immunoglobulin genes involved in immune response                              | GO:0002204 | 0.0345  | 28.5            | 1                  | 0.0                | 43              | Ndfip1                                                                                                    |
| somatic diversification of immunoglobulins involved in immune response                                 | GO:0002208 | 0.0345  | 28.5            | 1                  | 0.0                | 43              | Ndfip1                                                                                                    |
| positive regulation of neurite differentiation                                                         | GO:0046666 | 0.0359  | 6.6             | 2                  | 0.3                | 369             | Itih3, Fez1                                                                                               |
| multicellular organismal movement                                                                      | GO:0050879 | 0.0361  | 27.2            | 1                  | 0.0                | 45              | Tahz3                                                                                                     |
| RNA secondary structure unbinding                                                                      | GO:0010501 | 0.0361  | 27.2            | 1                  | 0.0                | 45              | Agp4                                                                                                      |
| cellular response to dsRNA                                                                             | GO:0071359 | 0.0361  | 27.2            | 1                  | 0.0                | 45              | Agp4                                                                                                      |
| musculoskeletal movement                                                                               | GO:0050881 | 0.0361  | 27.2            | 1                  | 0.0                | 45              | Tahz3                                                                                                     |
| cellular developmental process                                                                         | GO:0048869 | 0.0363  | 2.1             | 7                  | 3.3                | 4089            | Krt14, Agp4, Itih3, Fez1, Tahz3, Cep83, Ndfip1                                                            |
| positive regulation of cell differentiation                                                            | GO:0045597 | 0.0370  | 4.0             | 3                  | 0.7                | 313             | Itih3, Fez1, Tahz3                                                                                        |
| chitosaminoglycan biosynthetic process                                                                 | GO:0006024 | 0.0377  | 26.1            | 1                  | 0.0                | 47              | B3gat2                                                                                                    |
| single-organism process                                                                                | GO:0044689 | 0.0385  | 1.4             | 15                 | 10.8               | 13200           | Krt14, Bin2, Agp4, Gnal, Slc14a1, Itih3, Fez1, Tahz3, Tmem63c, Cep83, Sr3, Ndfip1, Fam129b, B3gat2, Car12 |
| positive regulation of tyrosine activity                                                               | GO:0051349 | 0.0385  | 28.5            | 1                  | 0.0                | 48              | Gnal                                                                                                      |
| protein localization to endoplasmic reticulum                                                          | GO:0070912 | 0.0385  | 28.5            | 1                  | 0.0                | 48              | Ndfip1                                                                                                    |
| negative regulation of leukocyte mediated immunity                                                     | GO:0002704 | 0.0385  | 28.5            | 1                  | 0.0                | 48              | Ndfip1                                                                                                    |
| somatic recombination of immunoglobulin gene segments                                                  | GO:0016447 | 0.0393  | 26.0            | 1                  | 0.0                | 49              | Ndfip1                                                                                                    |
| regulation of cell differentiation                                                                     | GO:0045595 | 0.0393  | 3.0             | 4                  | 1.3                | 1624            | Itih3, Fez1, Tahz3, Ndfip1                                                                                |
| carbohydrate derivative metabolic process                                                              | GO:1901135 | 0.0400  | 3.9             | 3                  | 0.8                | 947             | Itih3, Gnal, B3gat2                                                                                       |
| immunoglobulin production involved in immunoglobulin mediated immune response                          | GO:0002381 | 0.0400  | 24.5            | 1                  | 0.0                | 50              | Ndfip1                                                                                                    |
| interleukin biosynthetic process                                                                       | GO:0006623 | 0.0408  | 24.0            | 1                  | 0.0                | 51              | B3gat2                                                                                                    |
| cellular component biogenesis                                                                          | GO:0044085 | 0.0412  | 2.5             | 5                  | 2.0                | 243             |                                                                                                           |



**Appendix Table S4** Primary and secondary antibodies used for immunohistological analysis

| Antibody                                                                | Provider                                | Catalog Nr              | Dilution       |
|-------------------------------------------------------------------------|-----------------------------------------|-------------------------|----------------|
| <u>Primary antibody:</u>                                                |                                         |                         |                |
| anti AhR<br>rabbit polyclonal IgG                                       | US Bio                                  | 031714.200              | 1:300          |
| anti CD11b<br>rat monoclonal IgG <sub>2b</sub>                          | BIORAD                                  | MCA74GA                 | 1:250          |
| anti CD31<br>rat monoclonal IgG <sub>2b</sub>                           | BD Biosciences                          | 550274                  | 1:100          |
| anti CD45<br>rat monoclonal IgG <sub>2b</sub>                           | BD Biosciences                          | 550539                  | 1:500          |
| anti Collagen Type I<br>rabbit polyclonal IgG                           | Rockland                                | 600-401-103-0.5         | 1:200          |
| anti Collagen Type IV<br>rabbit polyclonal IgG                          | Millipore                               | AB8201                  | 1:40           |
| anti CSPG (CS-56)<br>mouse monoclonal IgM                               | Abcam                                   | ab11570                 | 1:250          |
| anti GFAP<br>mouse monoclonal IgG <sub>1</sub><br>rabbit polyclonal IgG | Sigma Aldrich<br>Dako                   | G3893<br>Z0334          | 1:500<br>1:500 |
| anti Iba1<br>rabbit polyclonal IgG                                      | Wako                                    | 019-19741               | 1:500          |
| anti Ki67<br>rat monoclonal IgG <sub>2a</sub><br>rabbit monoclonal IgG  | eBioscience<br>Thermo Fisher Scientific | 14-5698-82<br>MA5-14520 | 1:300<br>1:100 |
| anti NG2 (CSPG4)<br>rabbit polyclonal                                   | Millipore                               | AB5320                  | 1:400          |
| anti NeuN<br>mouse monoclonal IgG <sub>1</sub>                          | Millipore                               | MAB377                  | 1:100          |
| anti RFP<br>rabbit polyclonal IgG                                       | Rockland                                | 600-401-379             | 1:500          |
| anti S100(β-Subunit)<br>mouse monoclonal IgG <sub>1</sub>               | Sigma Aldrich                           | S2532                   | 1:250          |
| anti TMEM119<br>rabbit monoclonal IgG                                   | Abcam                                   | ab209064                | 1:200          |
| <u>Secondary antibody:</u>                                              |                                         |                         |                |
| anti-mouse IgG <sub>1</sub> Alexa Fluor 488                             | Thermo Fisher Scientific                | A-21121                 | 1:500          |
| anti-mouse IgM Alexa Fluor 488                                          | Thermo Fisher Scientific                | A-21042                 | 1:500          |
| anti-rabbit IgG Alexa Fluor 488                                         | Thermo Fisher Scientific                | A-21206                 | 1:500          |
| anti-rabbit IgG Alexa Fluor 647                                         | Thermo Fisher Scientific                | A-31573                 | 1:500          |
| anti-rat IgG Alexa Fluor 647                                            | Thermo Fisher Scientific                | A-21247                 | 1:500          |
| anti-mouse IgG CY3                                                      | Dianova                                 | 115-165-166             | 1:500          |
| anti-rabbit IgG CY3                                                     | Dianova                                 | 111-165-144             | 1:500          |
| anti-rat IgG CY3                                                        | Dianova                                 | 112-165-167             | 1:500          |
